# Supplementary material for: A dipodal molecular probe for naked eye detection of trivalent cations (Al3+, Fe3+and Cr3+) in aqueous medium and its applications in real sample analysis and molecular logic gates
Source: Royal Society of Chemistry journal article supplement (doi:10.1039/c8ra07041e), 2018-01-01
Supplement: c8ra07041e1.pdf [file c8ra07041e1.pdf]

# A dipodal molecular probe for naked eye detection of trivalent cations ( $\text{Al}^{3+}$ , $\text{Fe}^{3+}$ and $\text{Cr}^{3+}$ ) in aqueous medium and its applications in real sample analysis and molecular logic gate

Rukmani Chandra, Amit Kumar Manna, Kalyani Rout, Jahangir Mondal, and Goutam K. Patra\*

Department of Chemistry, Guru Ghasidas Vishwavidyalaya, Bilaspur (C.G)

## Table of Contents

| Sl.No. | Content                                                                                                                                                                                                                                                     | Figure No.      |
|--------|-------------------------------------------------------------------------------------------------------------------------------------------------------------------------------------------------------------------------------------------------------------|-----------------|
| 1      | Mass spectra of <b>L</b>                                                                                                                                                                                                                                    | <b>S1</b>       |
| 2      | IR spectra of <b>L</b>                                                                                                                                                                                                                                      | <b>S2</b>       |
| 3      | $^1\text{H}$ NMR spectra of <b>L</b>                                                                                                                                                                                                                        | <b>S3</b>       |
| 4      | Geometry optimized diagram of the molecule (a) <b>L</b> + $\text{Fe}^{3+}$ , (b) <b>L</b> + $\text{Al}^{3+}$ and (c) <b>L</b> + $\text{Cr}^{3+}$                                                                                                            | <b>S4</b>       |
| 5      | The contour diagrams of selected HOMO and LUMO orbitals of (a) <b>L</b> + $\text{Fe}^{3+}$ , (b) <b>L</b> + $\text{Al}^{3+}$ and (c) <b>L</b> + $\text{Cr}^{3+}$                                                                                            | <b>S5</b>       |
| 6      | The change in the absorbance intensity of <b>L</b> after addition of 1 equiv. of each of the metal ions in $\text{CH}_3\text{CN}:\text{H}_2\text{O}$ (1:1, v/v) at 418 nm                                                                                   | <b>S6</b>       |
| 7      | Absorbance spectra of <b>L</b> in different solvents                                                                                                                                                                                                        | <b>S7</b>       |
| 8      | Job's plot for of $\text{Al}^{3+}$ , $\text{Fe}^{3+}$ and $\text{Cr}^{3+}$                                                                                                                                                                                  | <b>S8</b>       |
| 9      | ESI-mass spectra of <b>L</b> - $\text{Al}^{3+}$ , <b>L</b> - $\text{Fe}^{3+}$ and <b>L</b> + $\text{Cr}^{3+}$                                                                                                                                               | <b>S9</b>       |
| 10     | Binding constants of (a) <b>L</b> - $\text{Al}^{3+}$ , (b) <b>L</b> - $\text{Fe}^{3+}$ and (c) <b>L</b> - $\text{Cr}^{3+}$ complexes                                                                                                                        | <b>S10</b>      |
| 11     | Detection limits for $\text{Al}^{3+}$ , $\text{Fe}^{3+}$ and $\text{Cr}^{3+}$                                                                                                                                                                               | <b>S11</b>      |
| 12     | Competitive selectivity of <b>L</b> towards $\text{Fe}^{3+}$ in the presence of other metal ions (1 equiv.) (a) absorbance spectra, (b) bar diagram taking absorption intensity at 422 nm in $\text{CH}_3\text{CN}/\text{H}_2\text{O}$ (1/1, v/v) solution. | <b>S12</b>      |
| 13     | Competitive selectivity of <b>L</b> towards $\text{Cr}^{3+}$ in the presence of other metal ions (1 equiv.) (a) absorbance spectra, (b) bar diagram taking absorption intensity at 416 nm in $\text{CH}_3\text{CN}/\text{H}_2\text{O}$ (1/1, v/v) solution. | <b>S13</b>      |
| 14     | Detection limit of <b>L'</b>                                                                                                                                                                                                                                | <b>S14</b>      |
| 15     | Stability constant of <b>L'</b>                                                                                                                                                                                                                             | <b>S15</b>      |
| 16     | Time evolution of $\text{Al}^{3+}$ , $\text{Fe}^{3+}$ and $\text{Cr}^{3+}$                                                                                                                                                                                  | <b>S16</b>      |
| 17     | Selected optimized bond distances ( $\text{\AA}$ ) and angles ( $^\circ$ ) of <b>L</b>                                                                                                                                                                      | <b>Table S1</b> |

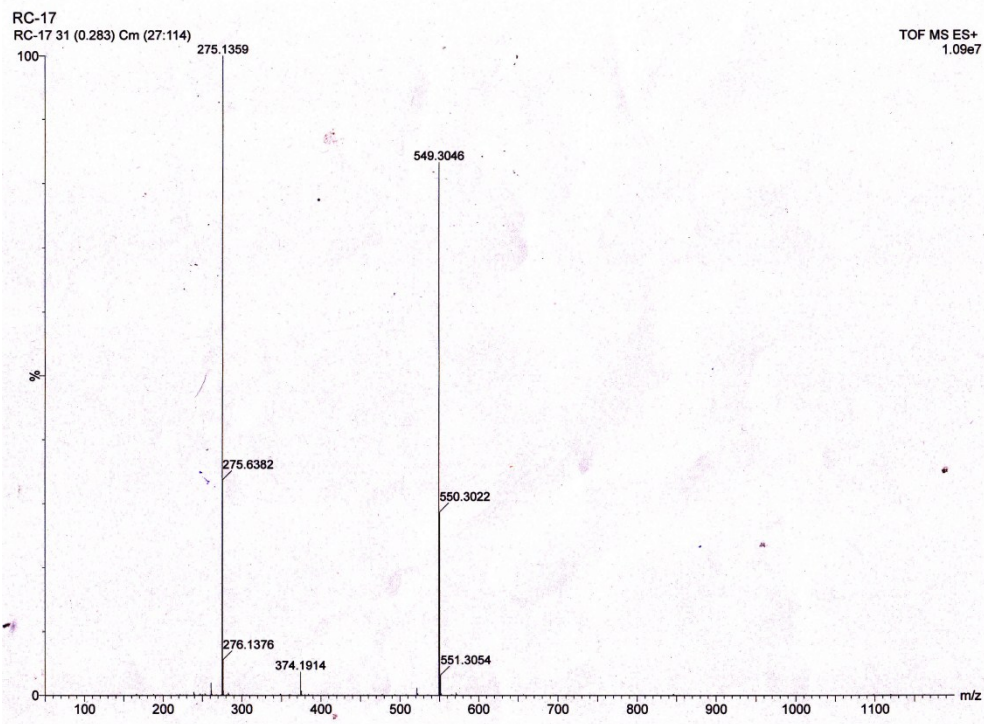

Fig. S1.ESI-MS spectra of L.

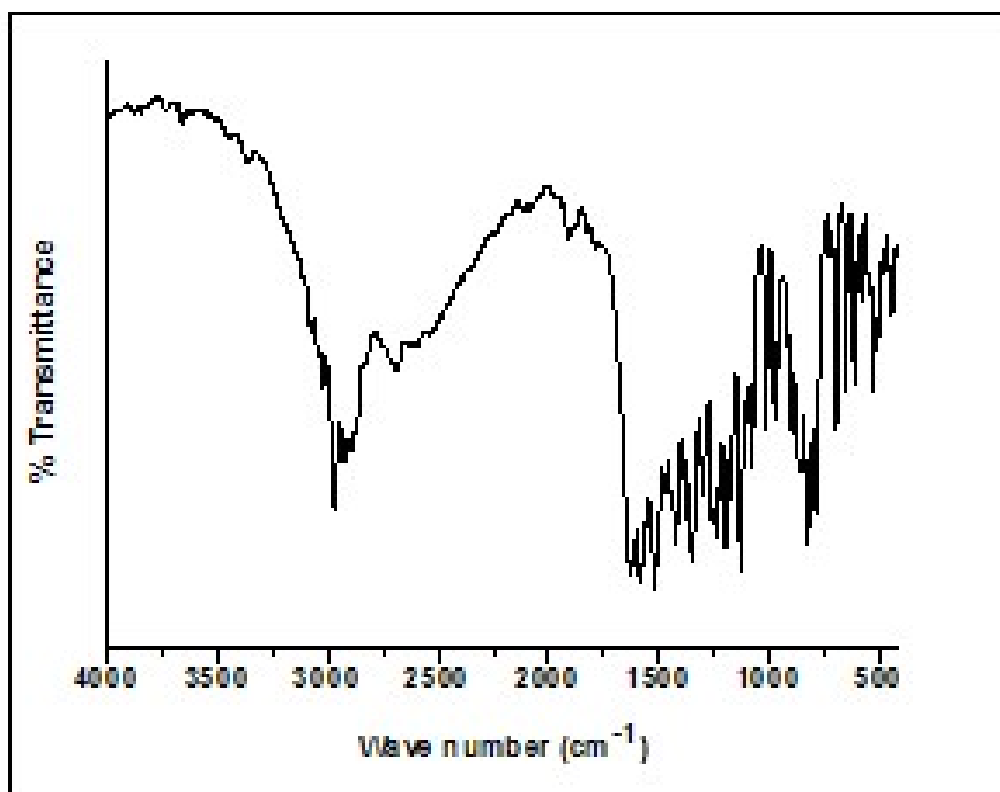

Fig. S2. FTIR spectra of L.

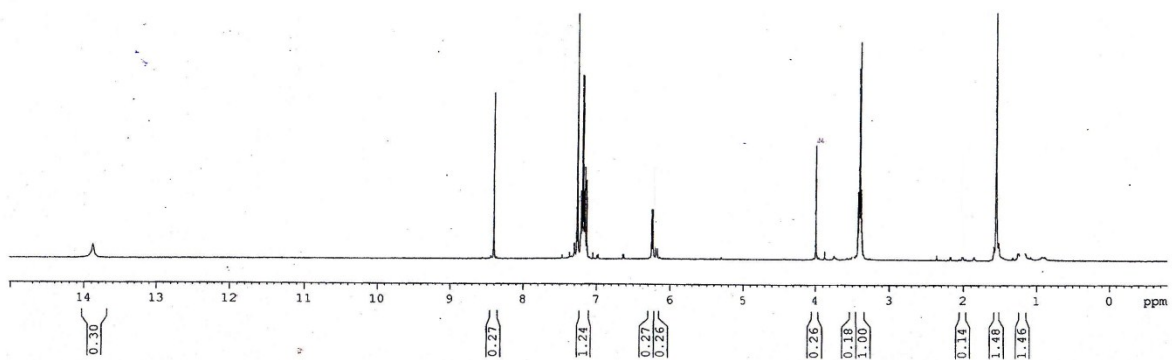

Fig. S3.  $^1\text{H}$  NMR spectra of L

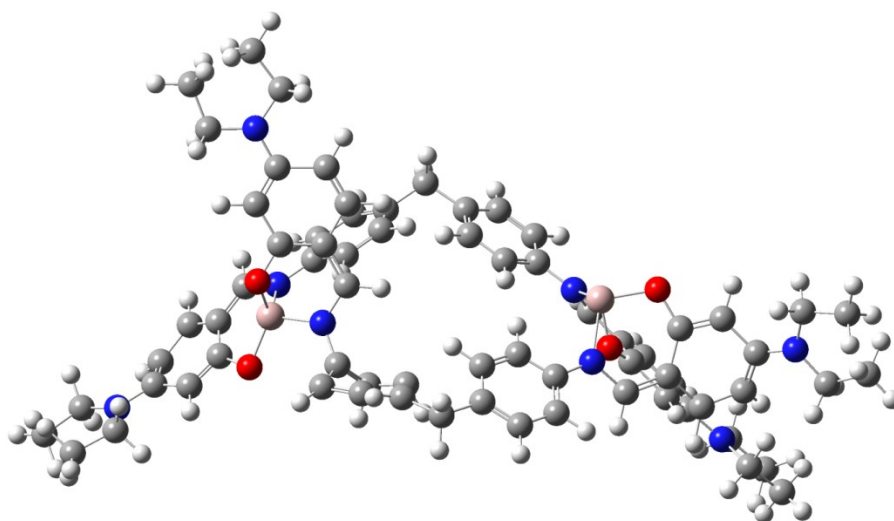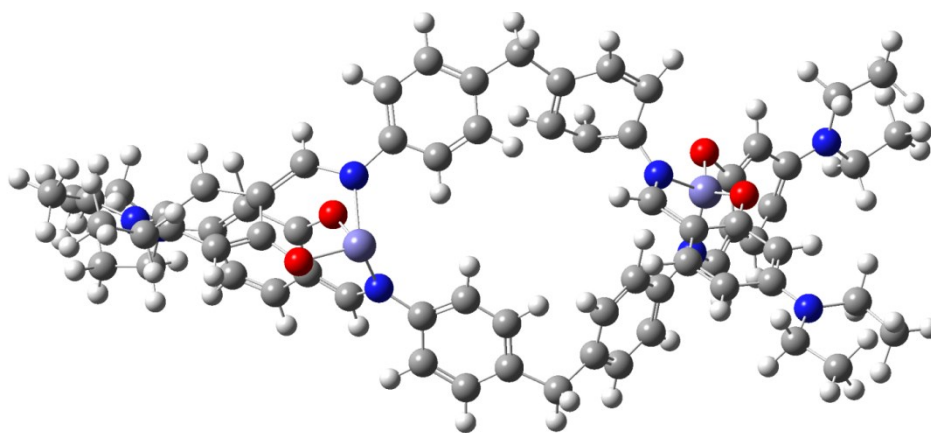

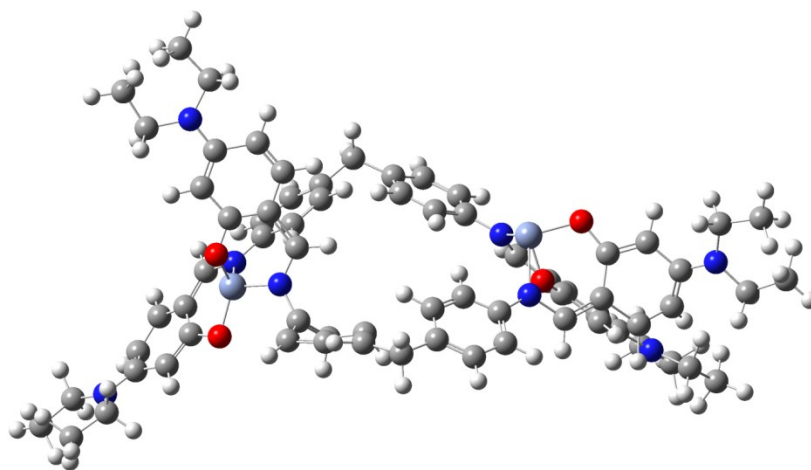

(c)

**Fig. S4.** Geometry optimized diagram of the molecule (a)  $L + Fe^{3+}$ , (b)  $L + Al^{3+}$  and (c)  $L + Cr^{3+}$

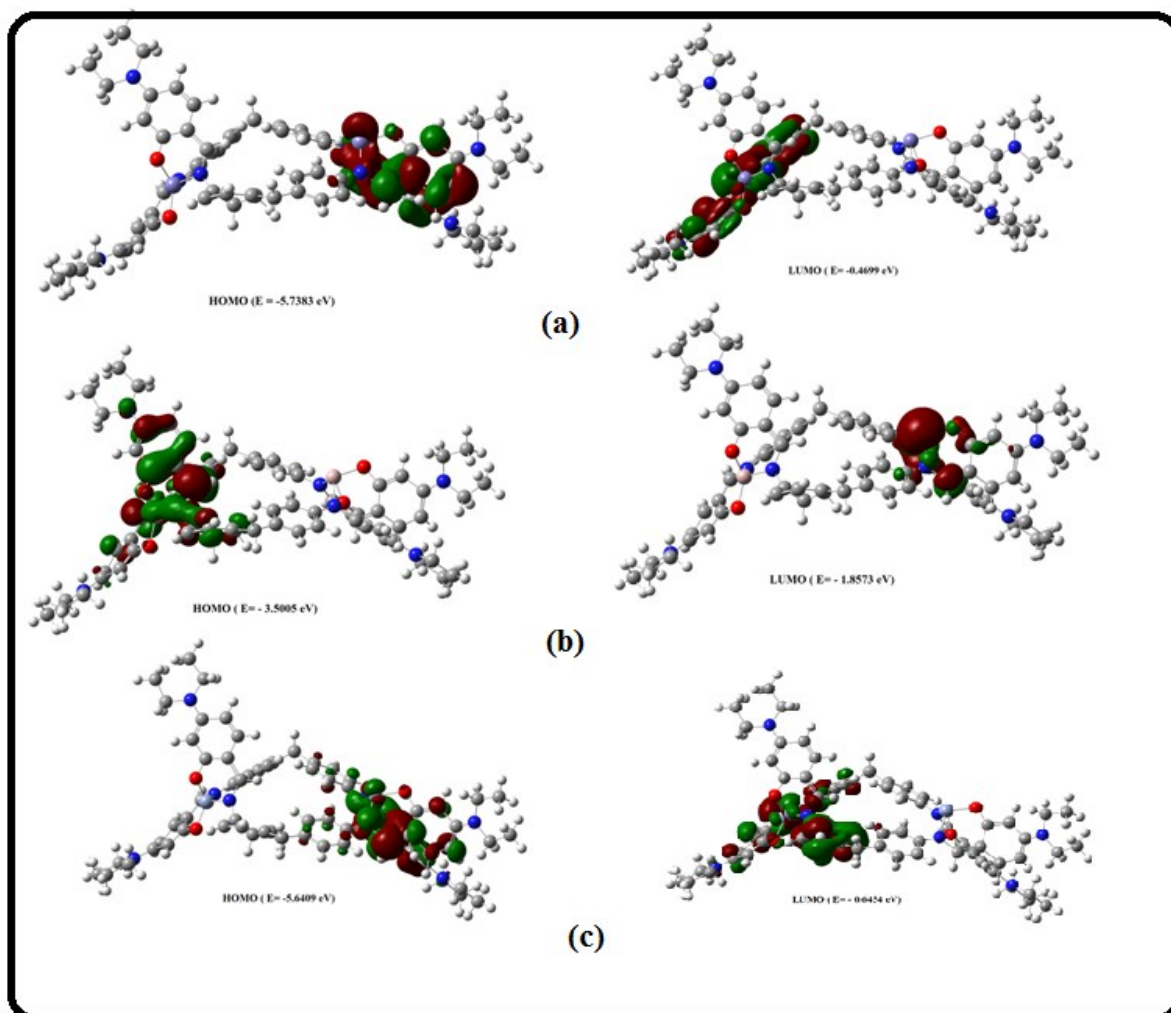

**Fig. S5.** The contour diagrams of selected HOMO and LUMO orbitals of (a)  $L + Fe^{3+}$ , (b)  $L + Al^{3+}$  and (c)  $L + Cr^{3+}$ .

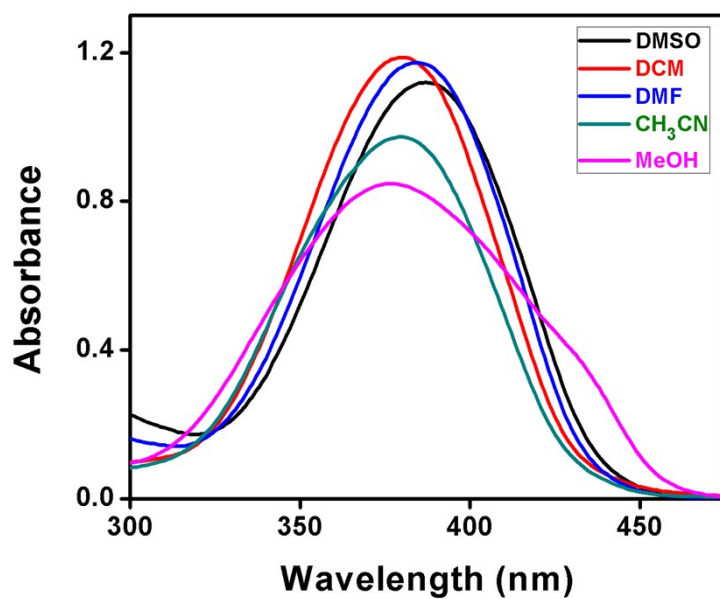

Fig. S6. Absorption spectra of L in different solvents.

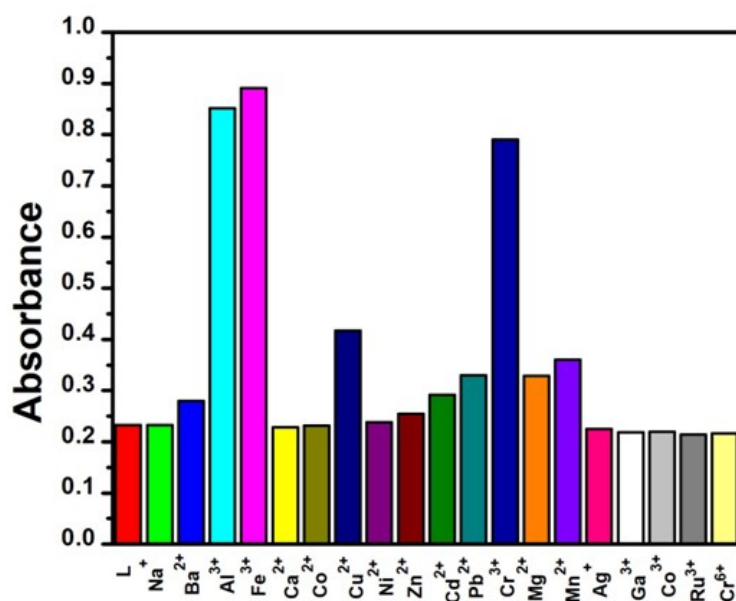

Fig. S7. The change in the absorbance intensity of L after addition of 1 equiv. of each of the metal ions in CH<sub>3</sub>CN:H<sub>2</sub>O (1:1, v/v) at 418 nm.

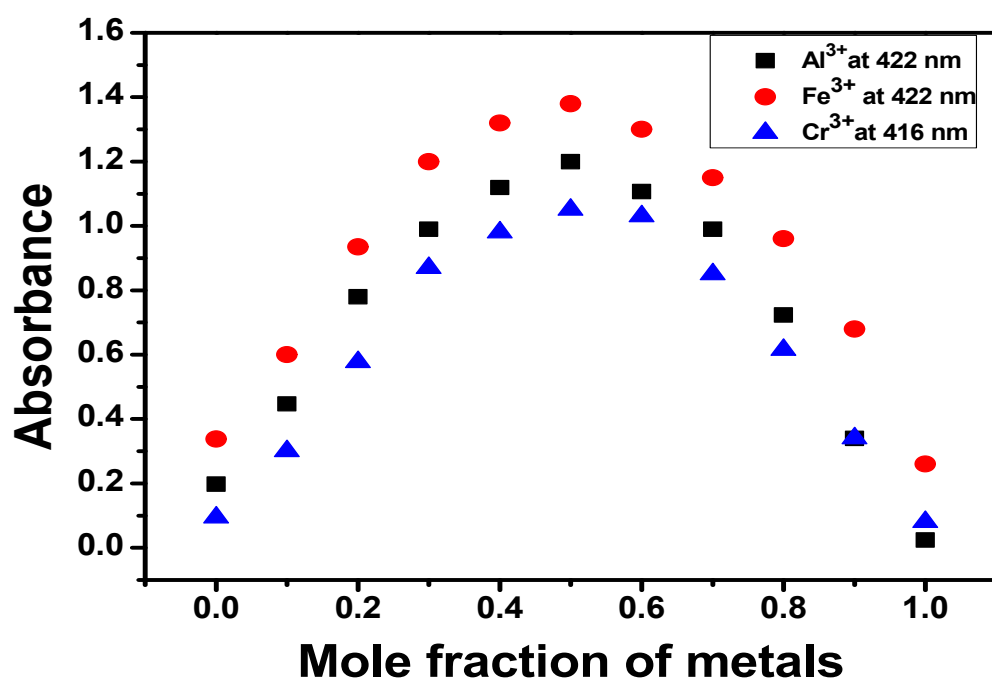

Fig. S8. Job plot for the binding of L with Al<sup>3+</sup>, Fe<sup>3+</sup> and Cr<sup>3+</sup>.

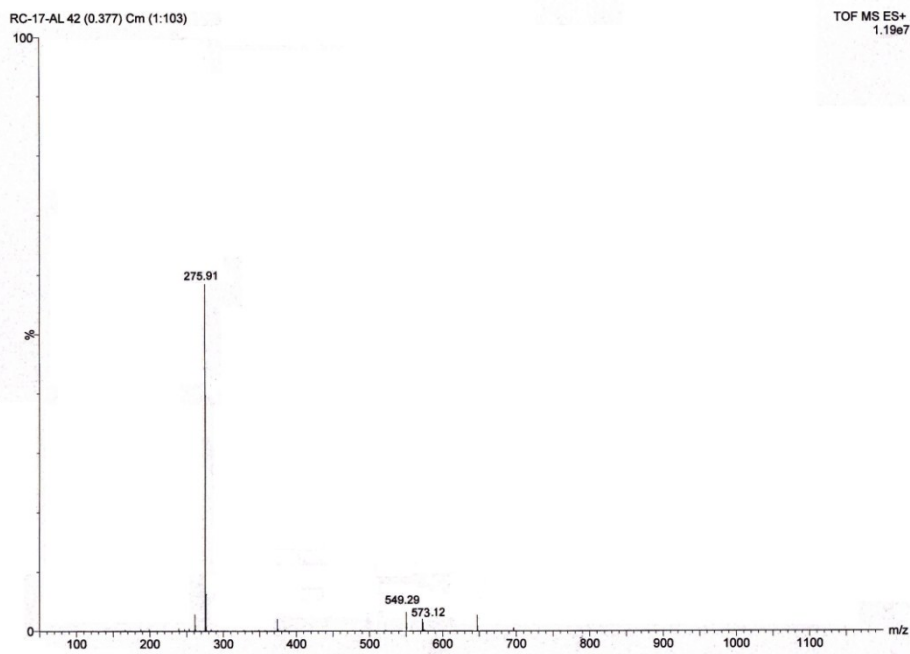

(a)

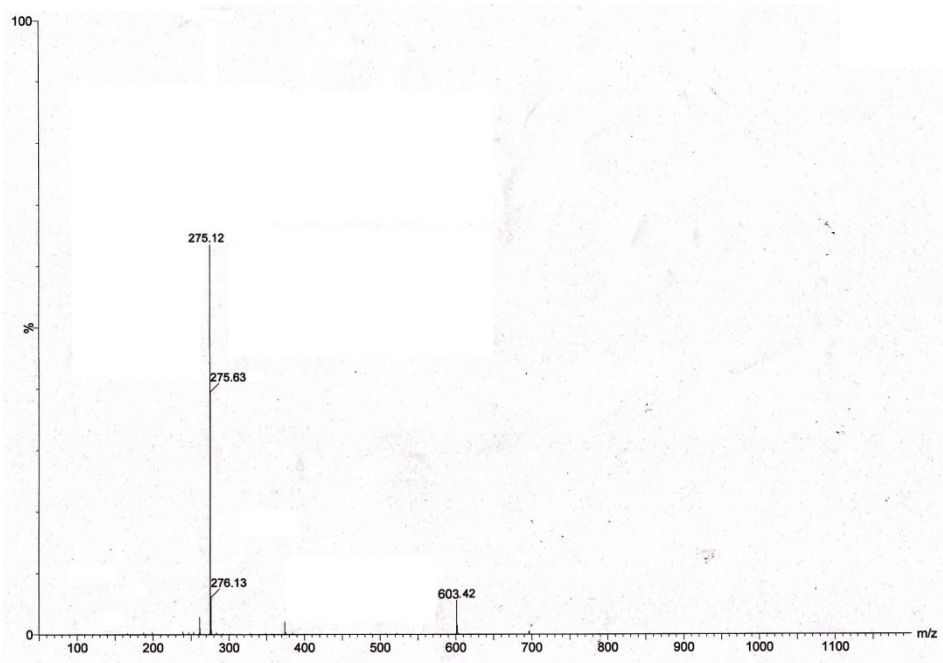

(b)

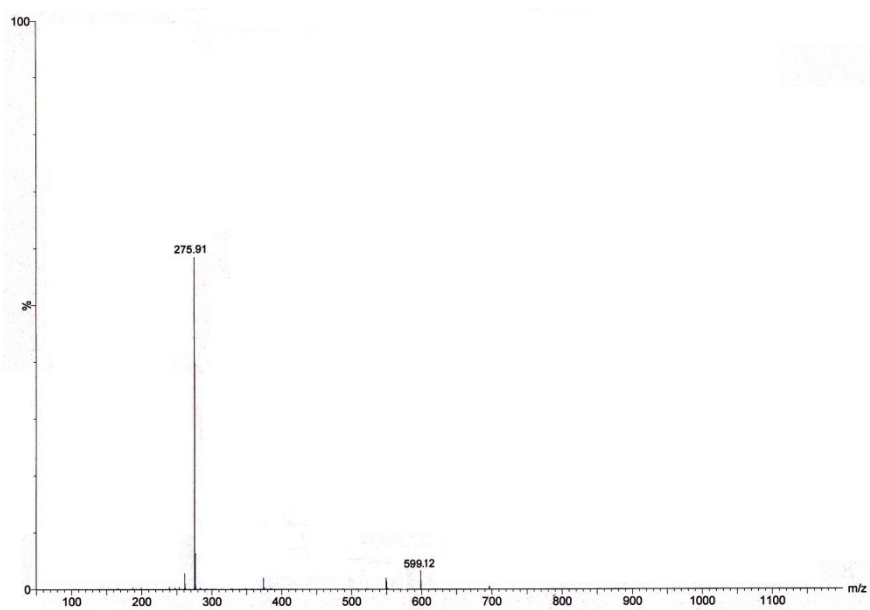

(c)

**Fig. S9.** ESI-MS spectra of (a)  $L-Al^{3+}$ , (b)  $L-Fe^{3+}$  and (c)  $L+Cr^{3+}$

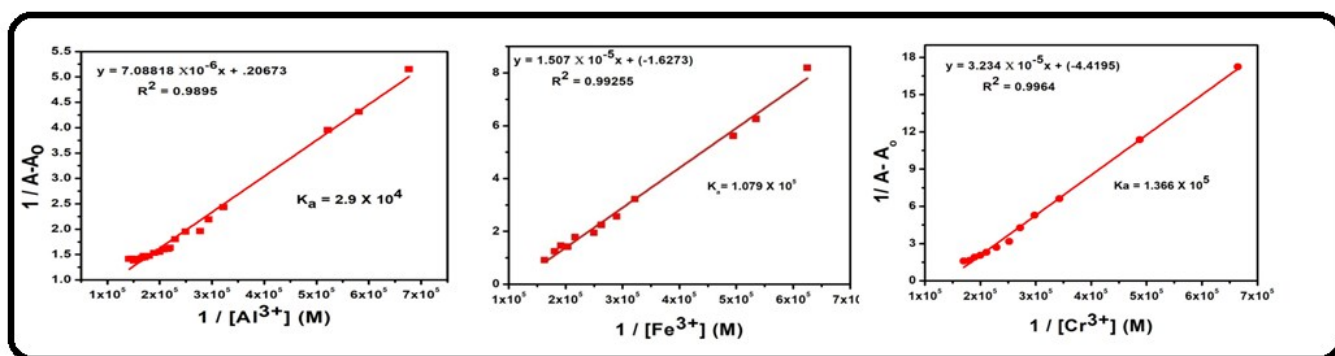

Fig. S10. Binding constants of (a) L-Al<sup>3+</sup>, (b) L-Fe<sup>3+</sup> and (c) L-Cr<sup>3+</sup> complexes.

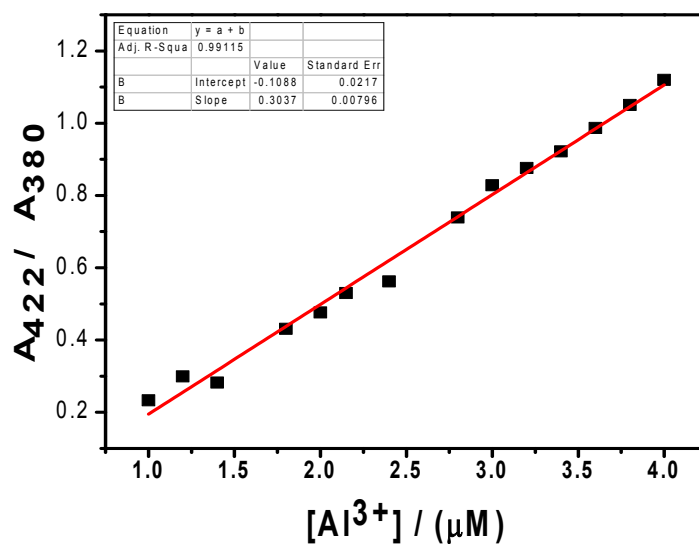

(a)

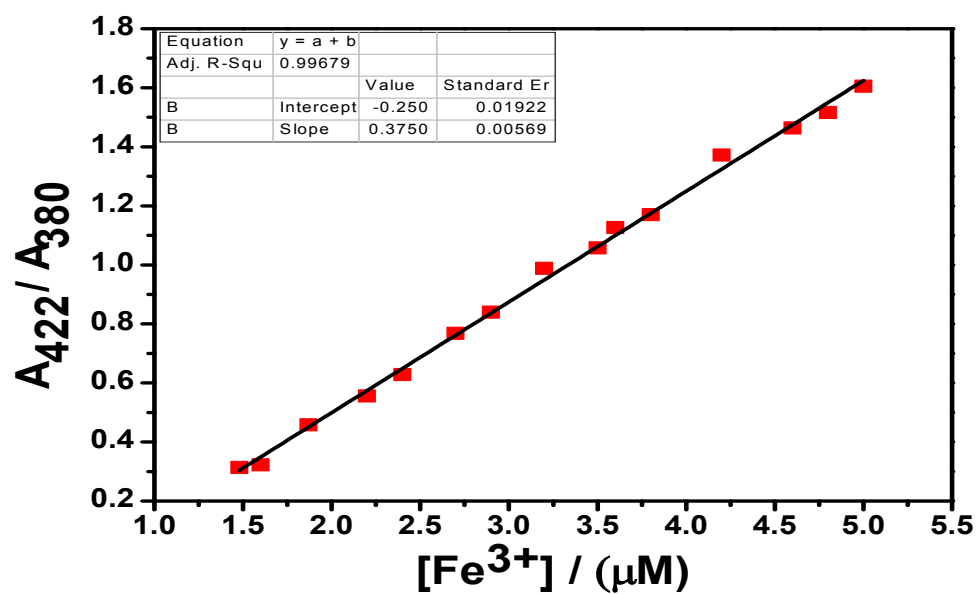



(b)

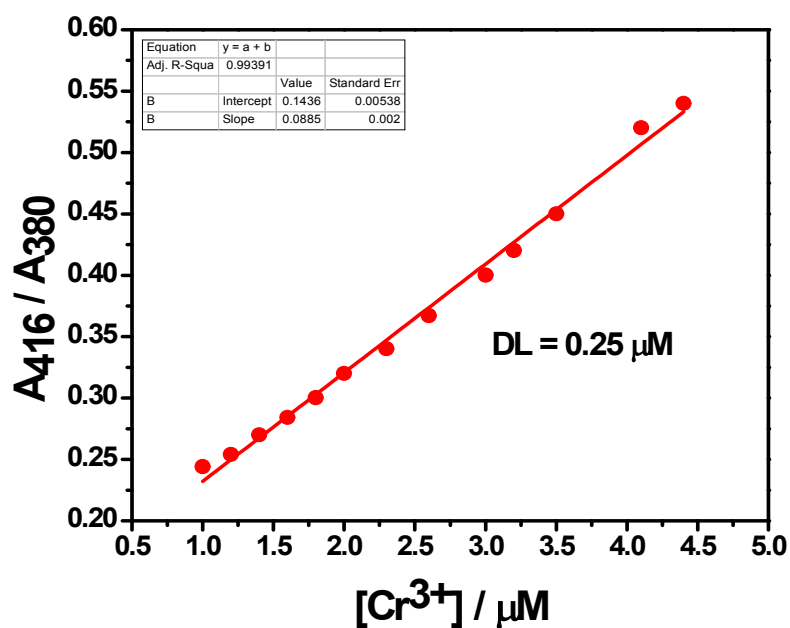

(c)

Fig. S11. Detection limits for (a)  $\text{Al}^{3+}$ , (b)  $\text{Fe}^{3+}$  and (c)  $\text{Cr}^{3+}$

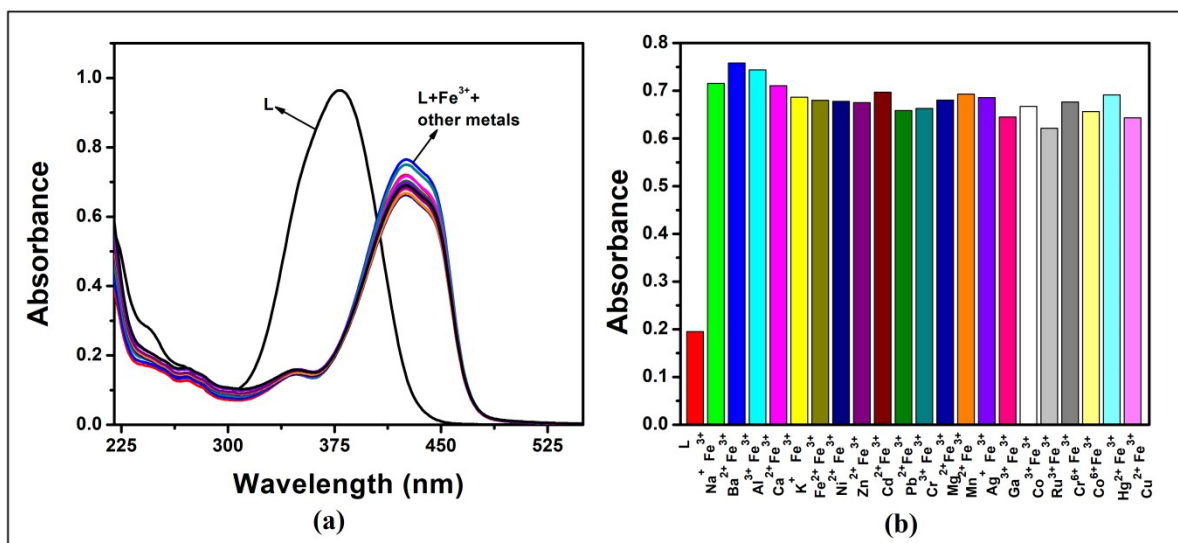

Fig. S12. Competitive selectivity of **L** towards  $\text{Fe}^{3+}$  in the presence of other metal ions (5 equiv.) (a) absorbance spectra, (b) bar diagram taking absorption intensity at 422 nm in  $\text{CH}_3\text{CN}/\text{H}_2\text{O}$  (1/1, v/v) solution.

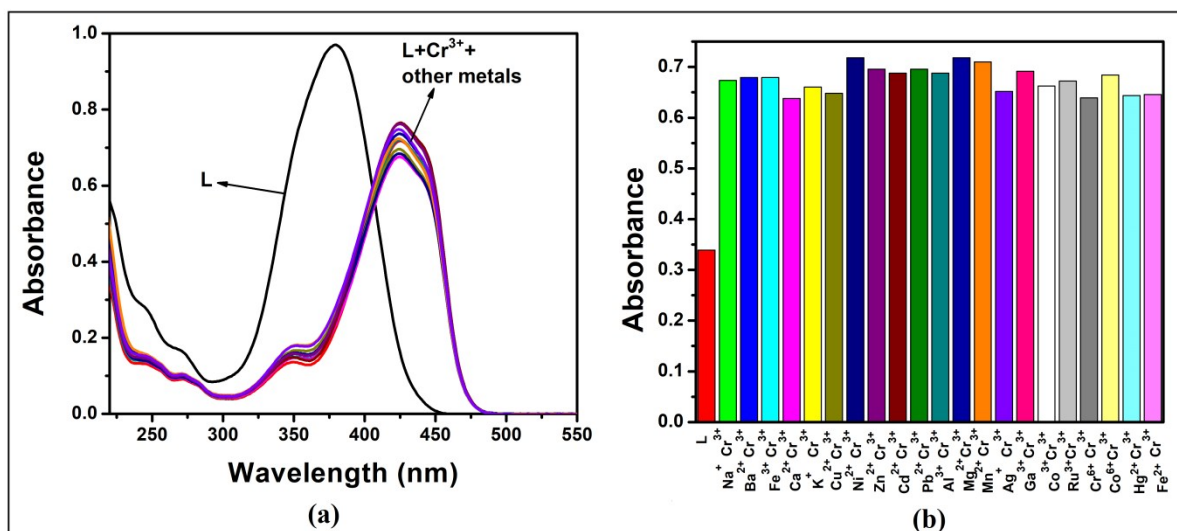

**Fig. S13.** Competitive selectivity of **L** towards  $\text{Cr}^{3+}$  in the presence of other metal ions (5 equiv.) (a) absorbance spectra, (b) bar diagram taking absorption intensity at 416 nm in  $\text{CH}_3\text{CN}/\text{H}_2\text{O}$  (1/1, v/v) solution.

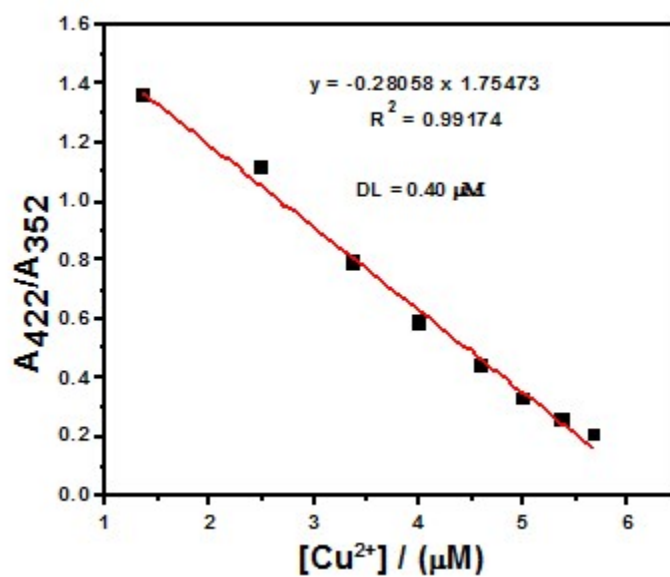

**Fig. S14.** Detection limit for  $\text{Cu}^{2+}$

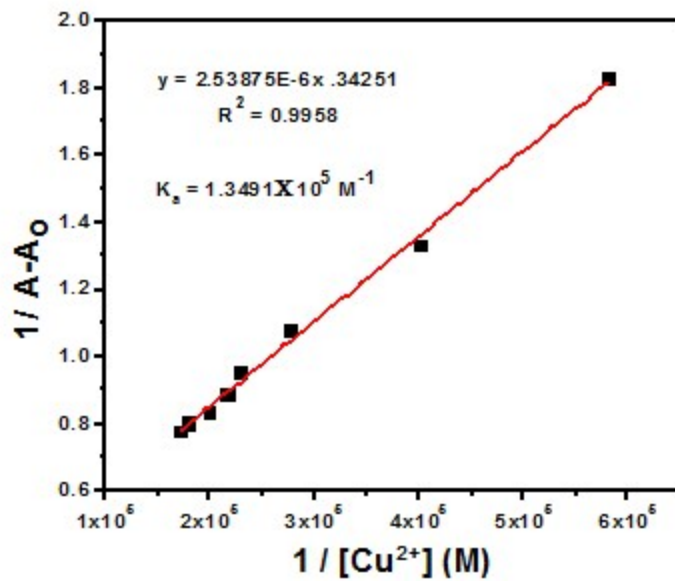

Fig. S15. Stability constant of L'-Cu<sup>2+</sup>

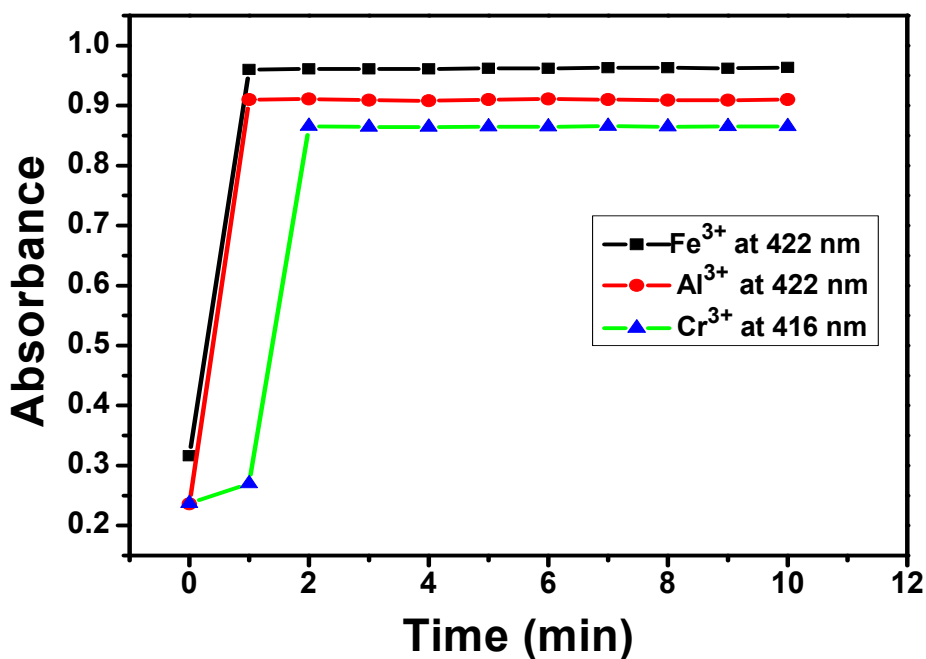

Fig. S16. Time evolution for Fe<sup>3+</sup>, Al<sup>3+</sup> and Cr<sup>3+</sup>

Table S1. Selected optimized bond distances (Å) and angles (°) of L

| Bond Length (Å) |        | Bond Angle (°) |          |
|-----------------|--------|----------------|----------|
| C1-C2           | 1.3916 | C2-C1-C3       | 119.723  |
|                 |        | C57-C56-C58    | 116.4854 |

|         |        |             |          |             |          |
|---------|--------|-------------|----------|-------------|----------|
| C1-C3   | 1.4104 | C1-C2-C4    | 120.5773 | C56-C57-C59 | 123.595  |
| C2-C4   | 1.4061 | C1-C3-C6    | 119.9209 | C56-C57-O65 | 115.6621 |
| C3-C6   | 1.4066 | C1-C3-N50   | 117.4539 | C59-C57-O65 | 120.7426 |
| C3-N50  | 1.428  | C6-C3-N50   | 122.4539 | C56-C58-C60 | 121.8981 |
| C4-C7   | 1.401  | C2-C4-C7    | 119.5013 | C57-C59-C62 | 118.6709 |
| C4-C10  | 1.506  | C2-C4-C10   | 120.0315 | C58-C60-C62 | 120.6474 |
| C6-C7   | 1.3966 | C7-C4-C10   | 120.459  | C59-C62-C60 | 118.7029 |
| C10-C11 | 1.5059 | C3-C6-C7    | 119.7877 | C59-C62-N67 | 120.6457 |
| C11-C12 | 1.4038 | C4-C7-C6    | 120.4886 | C60-C62-N67 | 120.6514 |
| C11-C13 | 1.4034 | C4-C10-C11  | 112.793  | C62-N67-C68 | 122.0461 |
| C12-C14 | 1.394  | C10-C11-C12 | 120.3152 | C62-N67-C69 | 121.941  |
| C13-C16 | 1.3943 | C10-C11-C13 | 120.2059 | C68-N67-C69 | 116.0108 |
| C14-C18 | 1.4085 | C12-C11-C13 | 119.473  | N67-C68-C70 | 111.5412 |
| C16-C18 | 1.4084 | C11-C12-C14 | 120.5498 | C67-C69-C71 | 111.5894 |
| C18-N53 | 1.4284 | C11-C13-C16 | 120.5386 |             |          |
| C21-C22 | 1.4114 | C12-C14-C18 | 119.7629 |             |          |
| C21-C23 | 1.4096 | C13-C16-C18 | 119.769  |             |          |
| C21-C52 | 1.465  | C14-C18-C16 | 119.9029 |             |          |
| C22-C24 | 1.3959 | C14-C18-N53 | 117.2902 |             |          |
| C22-O30 | 1.375  | C16-C18-N53 | 122.6447 |             |          |
| C23-C25 | 1.3863 | C22-C21-C23 | 116.5109 |             |          |
| C24-C27 | 1.4162 | C22-C21-C52 | 120.6621 |             |          |
| C25-C27 | 1.4233 | C23-C21-C52 | 122.827  |             |          |
| C27-N32 | 1.4047 | C21-C22-C24 | 123.4485 |             |          |
| N32-C33 | 1.49   | C21-C22-O30 | 115.7105 |             |          |
| N32-C34 | 1.4908 | C24-C22-O30 | 120.8403 |             |          |

|         |        |             |          |
|---------|--------|-------------|----------|
| C33-C35 | 1.5281 | C21-C23-C25 | 121.8034 |
| C34-C36 | 1.5277 | C22-C24-C27 | 118.8337 |
| N50-C51 | 1.3004 | C23-C25-C27 | 120.7744 |
| C51-C56 | 1.4634 | C24-C27-C25 | 118.6246 |
| C52-N53 | 1.3    | C24-C27-N32 | 120.5963 |
| C56-C57 | 1.4115 | C25-C27-N32 | 120.6017 |
| C56-C58 | 1.4109 | C27-N32-C33 | 119.8171 |
| C57-C59 | 1.3948 | C27-N32-C34 | 119.6529 |
| C57-O65 | 1.3751 | C33-N32-C34 | 114.8051 |
| C58-C60 | 1.3845 | N32-C33-C35 | 113.9605 |
| C59-C62 | 1.4189 | N32-C34-C36 | 113.9522 |
| C60-C62 | 1.4266 | C3-N50-C51  | 121.5536 |
| C62-N67 | 1.3891 | N50-C51-C56 | 120.231  |
| N67-C68 | 1.4859 | C21-C52-N53 | 120.1215 |
| N67-C69 | 1.4866 | C18-N53-C52 | 121.5511 |
| C68-C70 | 1.5286 | C51-C56-C57 | 120.728  |
| C69-C71 | 1.5282 | C51-C56-C58 | 122.7865 |
